# Supplementary material
Source: PubMed Central journal article supplement (PMC7896582)
Supplement: bcr-2020-236963supp001.pdf [file bcr-2020-236963supp001.pdf]

**Supplementary Table 1.** Musical hallucinations recorded by the patient's wife over a 24 hour period during his disease course

| <b>Time</b>           | <b>Song title</b>                                     | <b>Artist</b>                         |
|-----------------------|-------------------------------------------------------|---------------------------------------|
| 7:10 a.m.             | Dancing Queen                                         | ABBA                                  |
| 7:17 a.m.             | My Way                                                | Elvis Presley                         |
| 7:30 a.m.             | You Can't Stop the Music                              | The Village People                    |
| 7:42 a.m.             | Pump Up the Jam                                       | Technotronic                          |
| 8:10 a.m.             | Treat Her Like a Lady                                 | The Temptations                       |
| 9:10 a.m.             | You Make Me Feel Like a<br>Natural Woman              | Aretha Franklin                       |
| 9:57 a.m.             | Dancing Queen                                         | ABBA                                  |
| 12:18 p.m.            | It's a Kind of Magic                                  | Queen                                 |
| 12:39 p.m.            | Rock Your Baby                                        | George McRae                          |
| 1:15 p.m.             | Every Breath You Take                                 | The Police                            |
| 1:30 p.m.             | Unsure of title                                       | Carly Simon                           |
| 1:53 p.m.             | Mississippi                                           | Pussycat                              |
| 4:33 p.m.             | Unsure of title                                       | Craig McLachlan                       |
| 5:00 p.m.             | Saving All My Love for You                            | Whitney Houston                       |
| 6:10 p.m.             | Unsure title                                          | Culture Club                          |
| 6:41 p.m. – 7:40 p.m. | Various songs from Saturday<br>Night Fever soundtrack | Bee Gees                              |
| 8:02 p.m.             | I'm Gonna Miss You                                    | Milli Vanilli                         |
| 8:35 p.m.             | The Track of My Tears                                 | Smoky Robinson and the<br>Miracles    |
| 8:49 p.m. – 9:15p.m.  | The Girl is Mine                                      | Michael Jackson and Paul<br>McCartney |
| 10:27 p.m.            | Talk It Over                                          | Grayson Hugh                          |
| 11:11 p.m.            | Venus                                                 | Bananarama                            |
| 11:27 p.m.            | Xanadu                                                | Olivia Newton John                    |
